# Supplementary material for: Rs2853677 modulates Snail1 binding to the TERT enhancer and affects lung adenocarcinoma susceptibility
Source: PubMed Central journal article supplement (PMC5122352; doi:10.18632/oncotarget.9339), 2016-05-13
Supplement: oncotarget-07-37825-s001.pdf [file oncotarget-07-37825-s001.pdf]

## Rs2853677 modulates Snail1 binding to the *TERT* enhancer and affects lung adenocarcinoma susceptibility

### Supplementary Materials

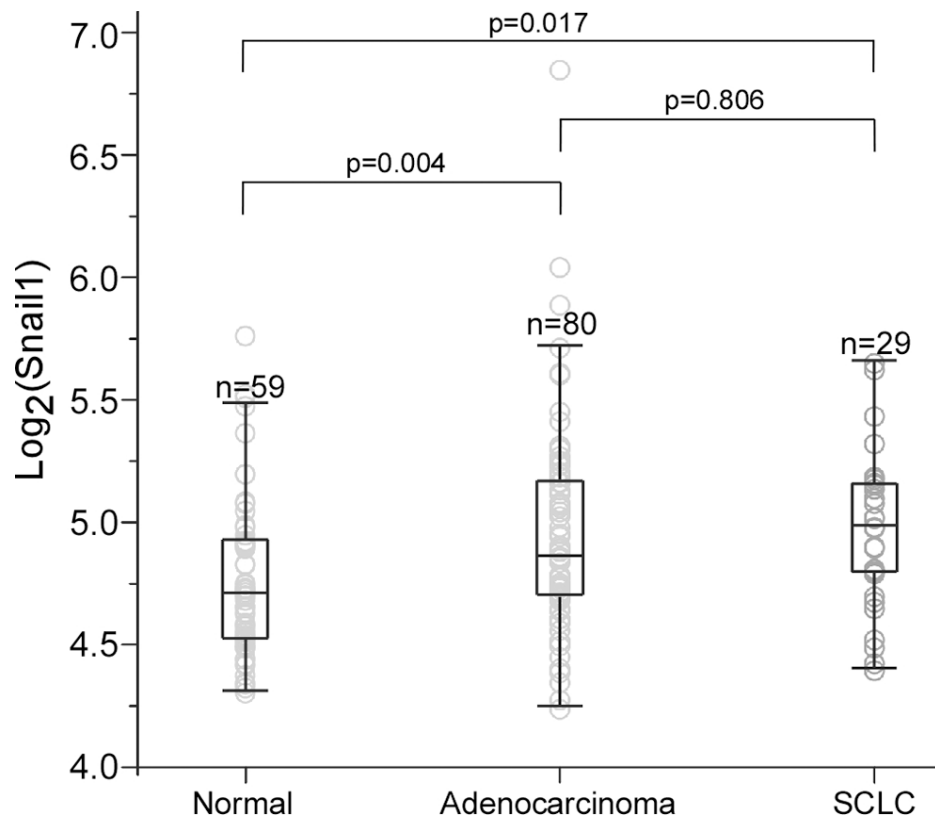

**Supplementary Figure S1: Snail1 expression in lung adenocarcinoma cell lines and in SCLC cell lines.** Gene Expression Omnibus database (GSE32036) was interrogated for Snail1 expression in human normal lung epithelial cells (59), lung adenocarcinoma cell lines (80) and SCLC cell lines (29) [39].
